# Supplementary material for: How reliable is the linear noise approximation of gene regulatory networks?
Source: PubMed Central journal article supplement (PMC3849541; doi:10.1186/1471-2164-14-s4-s5), 2013-10-01

Coefficient of variation (LNA &amp; IOS)

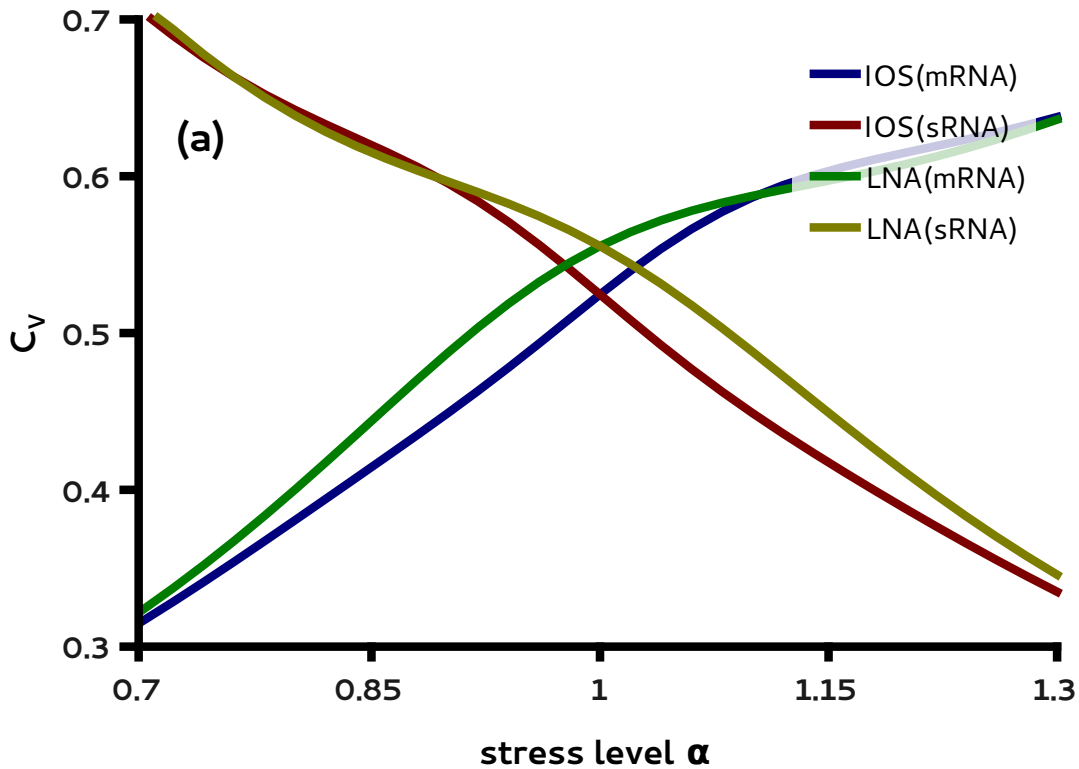

Coefficient of variation (SSA)

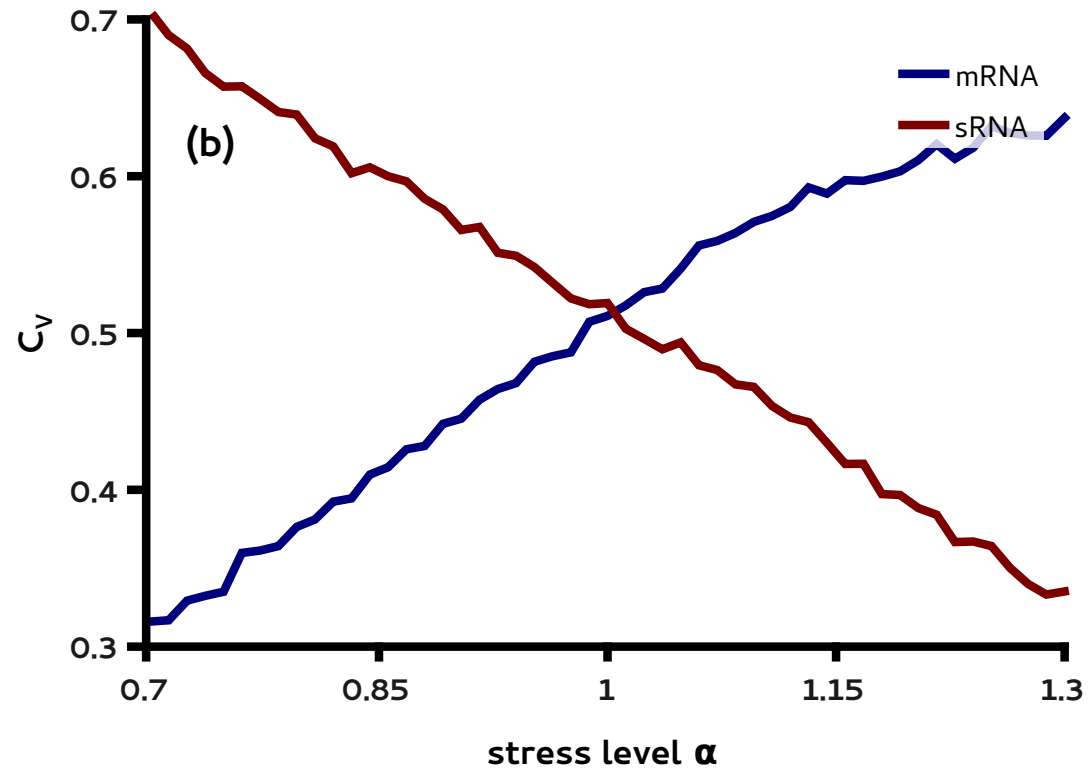

Supplement: 1471-2164-14-S4-S5-S1.pdf [file 1471-2164-14-S4-S5-S1.pdf]
