# Supplementary material for: How reliable is the linear noise approximation of gene regulatory networks?
Source: PubMed Central journal article supplement (PMC3849541; doi:10.1186/1471-2164-14-s4-s5), 2013-10-01
Supplement: 1471-2164-14-S4-S5-S4.pdf [file 1471-2164-14-S4-S5-S4.pdf]

(a)

Intrinsic Noise Analyzer

File Edit Analysis Help

Models

- Species
- Reactions

Reactions

|   | Name             | Reaction                      | Propensity                                                           |
|---|------------------|-------------------------------|----------------------------------------------------------------------|
| 1 | Transcription    | Gene $\rightarrow$ Gene +     | $k_0 \cdot \text{Cell} \cdot [\text{Gene}]$                          |
| 2 | Translation      | mRNA $\rightarrow$ Protein    | $[\text{mRNA}] \cdot \text{Cell} \cdot k_s$                          |
| 3 | Enzyme binding   | Protein + Enzyme              | $k_1 \cdot [\text{Protein}] \cdot \text{Cell} \cdot [\text{Enzyme}]$ |
| 4 | Enzyme unbinding | Complex $\rightarrow$ Protein | $[\text{Complex}] \cdot \text{Cell} \cdot k_2$                       |
| 5 | Enzyme catalysis | Complex $\rightarrow$ Enzyme  | $[\text{Complex}] \cdot \text{Cell} \cdot k_2$                       |
| 6 | mRNA degradation | mRNA $\rightarrow \emptyset$  | $[\text{mRNA}] \cdot \text{Cell} \cdot k_{dm}$                       |

(b)

Create new reaction

Specify chemical equation and propensity

Name: Formation of Complex

Chemical equation:  $A + E \rightarrow C$

Type: Mass action

Propensity:  $k \cdot \text{Cell} \cdot [A][E]$

< Back Next > Cancel

(c)

ina

```
@model:3.1.1 = GeneExpression "Gene Expression II"

@units
substance = mole: s=-6
time = second: m=60

@compartments
cell = 1e-15 "cell"

@species
cell: [Gene] = 1.66e-08
cell: [mRNA] = 0
cell: [Protein] = 0
cell: [Enzyme] = 0.1
cell: [Complex] = 0

@parameters
k0=1.44578e+06
ks=1.5
kdM=0.2
k1=400
km1=2
k2=2

@reactions
@r= transcription "Transcription"
Gene -> mRNA + Gene
k0*Gene*cell

@r= translation "Translation"
mRNA -> Protein + mRNA
ks*mRNA*cell

@r= degrade_mRNA "mRNA degradation"
mRNA ->
mRNA*kdm*cell
```

Cancel Open
